# Supplementary material
Source: PubMed Central journal article supplement (PMC3001849)
Supplement: supp_dkq401_dkq401supp.pdf [file supp_dkq401_dkq401supp.pdf]

## Supplementary data

**Figure S1.** Susceptibility of bloodstream forms of *T. brucei* 427 WT (A) and *L. mexicana* promastigotes (B) or amastigotes (C) to compounds T1 and MS1. The experiments were performed using Alamar blue as described in the Materials and methods section and are representative of at least three independent determinations. T1, filled circles; and MS1, open triangles. The positive control (filled squares) was diminazene aceturate (A) or pentamidine (B and C).

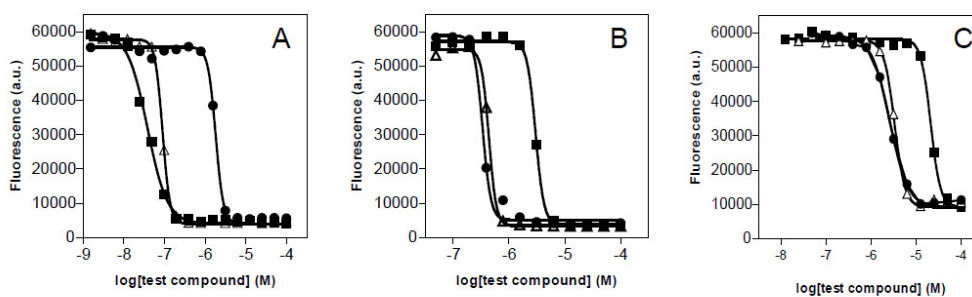

**Figure S2.** Choline uptake by kinetoplastid parasites. Uptake of 0.25  $\mu\text{M}$  [ $^3\text{H}$ ]choline uptake by (A) *T. brucei* 427 bloodstream forms and (B) *L. mexicana* promastigotes over 120 s in the presence (open circles) or absence (filled squares) of 1 mM unlabelled choline was monitored at the indicated incubation times. Assays were performed in triplicate and are representative of four similar experiments. Error bars are SEM.

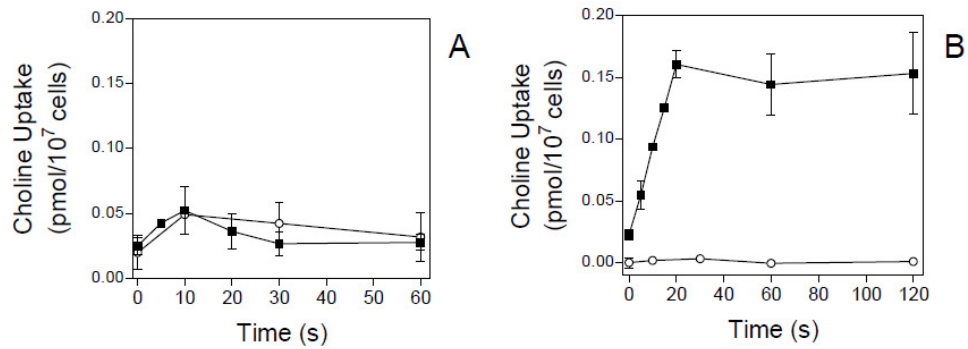

**Figure S3.** DNA content of PI-permeable *T. b. brucei* after incubation with choline-derived analogues. Cultures treated with various concentrations of the compounds were harvested by centrifugation (10 min, 2500 g), stained for 10 min with 5 µg/mL PI at room temperature and in the dark, and analysed by flow cytometry.

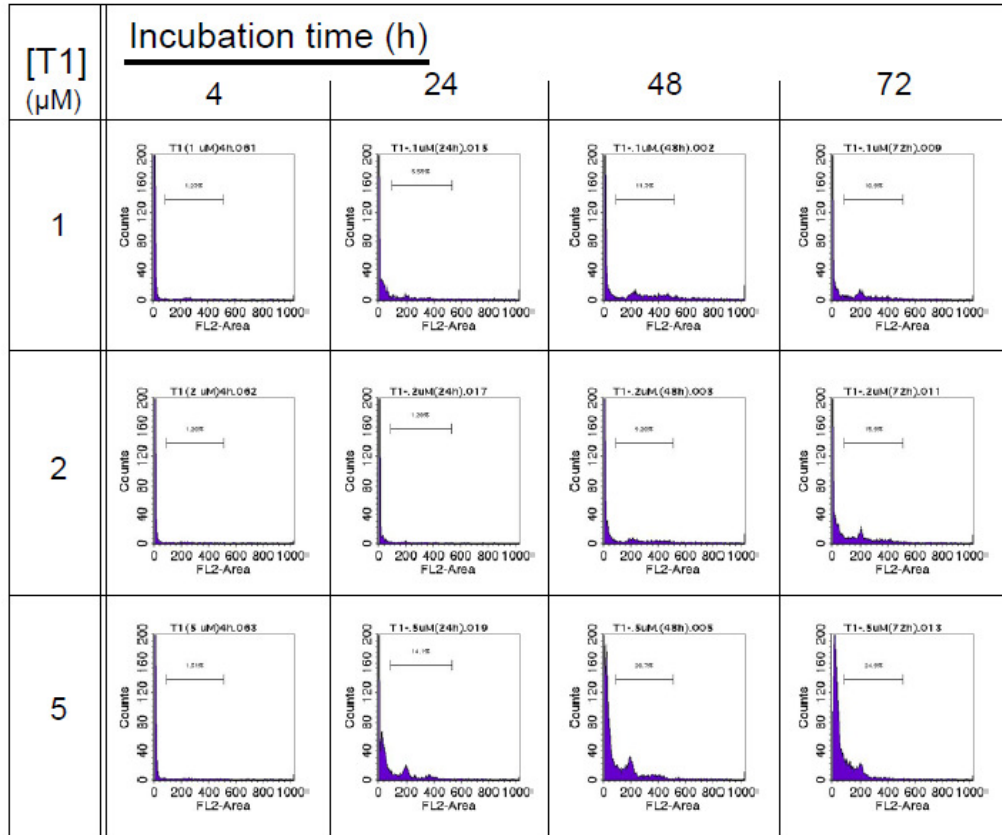

| [T3]<br>( $\mu\text{M}$ ) | Incubation time (h) |    |    |    |
|---------------------------|---------------------|----|----|----|
|                           | 4                   | 24 | 48 | 72 |
| 1                         |                     |    |    |    |
| 2                         |                     |    |    |    |
| 5                         |                     |    |    |    |

| [T4]<br>( $\mu$ M) | Incubation time (h) |    |    |    |
|--------------------|---------------------|----|----|----|
|                    | 4                   | 24 | 48 | 72 |
| 1                  |                     |    |    |    |
| 2                  |                     |    |    |    |
| 5                  |                     |    |    |    |

| [M38]<br>( $\mu\text{M}$ ) | Incubation time (h) |    |    |    |
|----------------------------|---------------------|----|----|----|
|                            | 4                   | 24 | 48 | 72 |
| 1                          |                     |    |    |    |
| 2                          |                     |    |    |    |
| 5                          |                     |    |    |    |

| [G25]<br>( $\mu\text{M}$ ) | Incubation time (h) |    |    |    |
|----------------------------|---------------------|----|----|----|
|                            | 4                   | 24 | 48 | 72 |
| 1                          |                     |    |    |    |
| 2                          |                     |    |    |    |
| 5                          |                     |    |    |    |

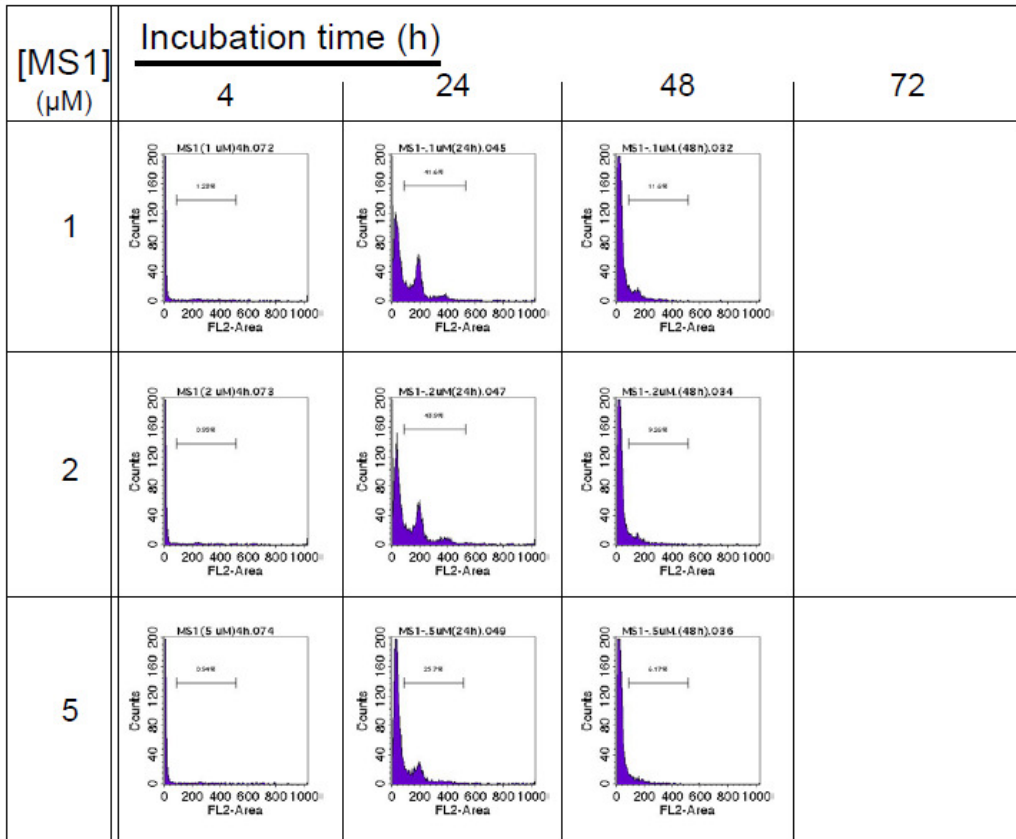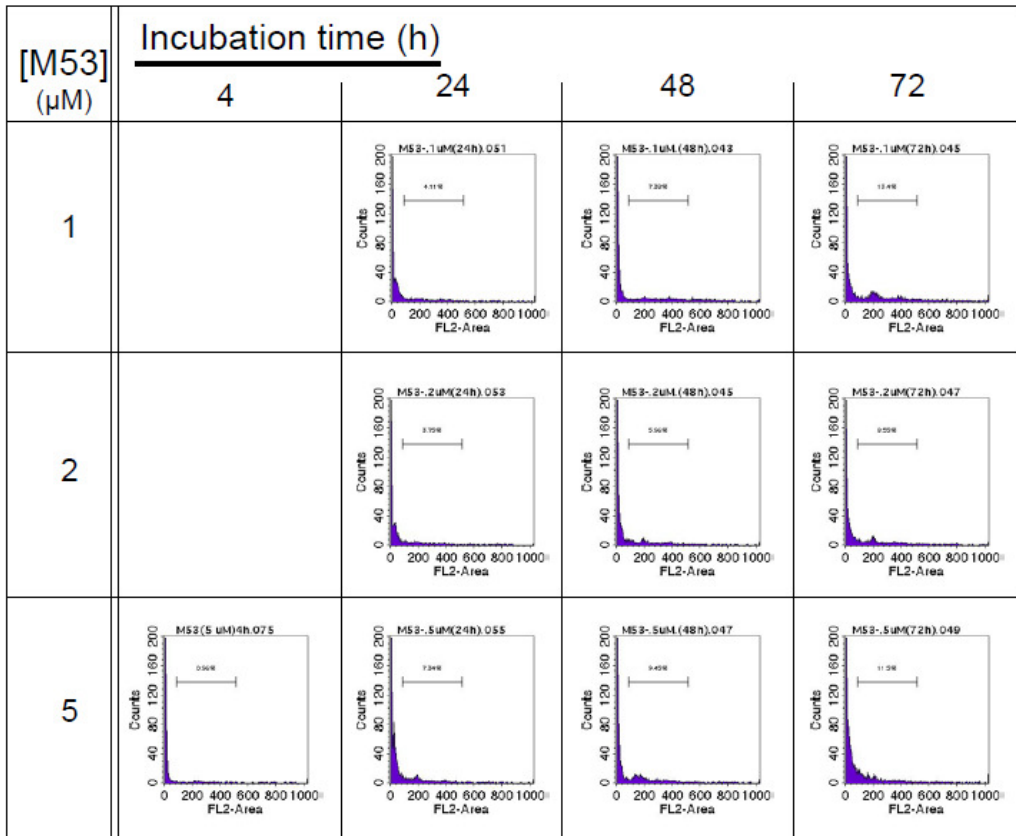



**Figure S4.** Effect of choline-derived analogues on intracellular calcium levels. WT trypanosomes loaded with Fluo-8 were incubated with choline test compound (20  $\mu$ M) or calcium ionophore A23187 (10  $\mu$ M) and fluorescence was monitored. The experiment is representative of three identical ones.

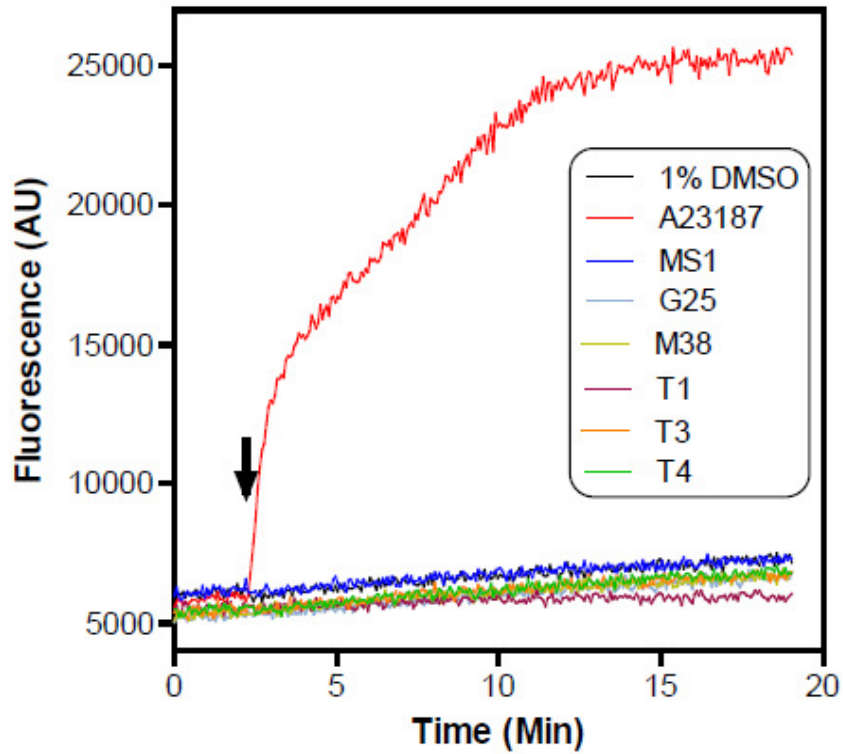

**Figure S5.** Effect of choline-derived analogues on production of ROS in bloodstream forms of *T. brucei* WT. Parasites at  $2 \times 10^6$  cells/mL in PBS were cultured in 96-well plates in the presence or absence of 100  $\mu\text{M}$   $\text{H}_2\text{O}_2$  and the choline-derived analogues T1 (A) and MS1 (B). Production of ROS was measured using the fluorescent indicator dye DCFH-DH. Choline analogues were at: 50  $\mu\text{M}$  (a); 25  $\mu\text{M}$  (b); 12.5  $\mu\text{M}$  (c); 6.25  $\mu\text{M}$  (d); 3.13  $\mu\text{M}$  (e); 1.56  $\mu\text{M}$  (f); 0.78  $\mu\text{M}$  (g); 0.39  $\mu\text{M}$  (h) and 0.195  $\mu\text{M}$  (i). Other traces represent: parasites incubated without test compound (j); cells incubated with 100  $\mu\text{M}$   $\text{H}_2\text{O}_2$  (k); PBS without parasites (l); and 100  $\mu\text{M}$   $\text{H}_2\text{O}_2$  without parasites (m). This experiment is representative of two identical experiments performed independently.

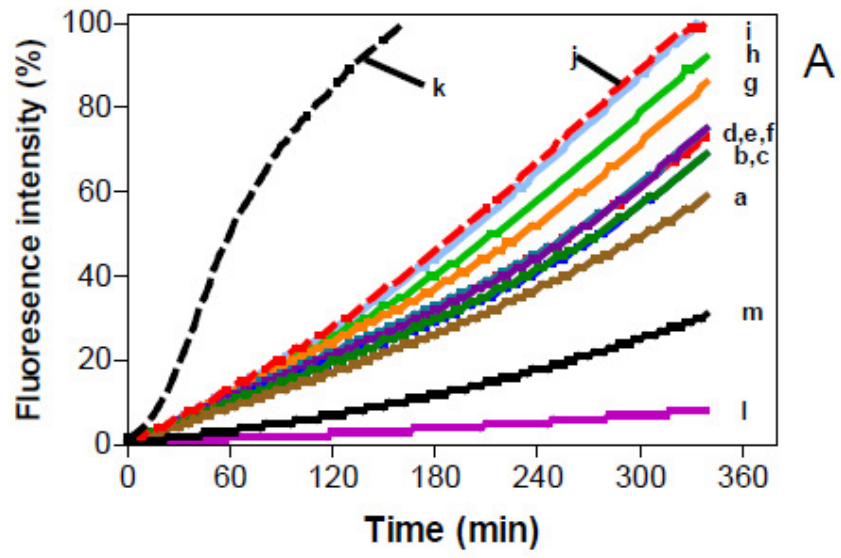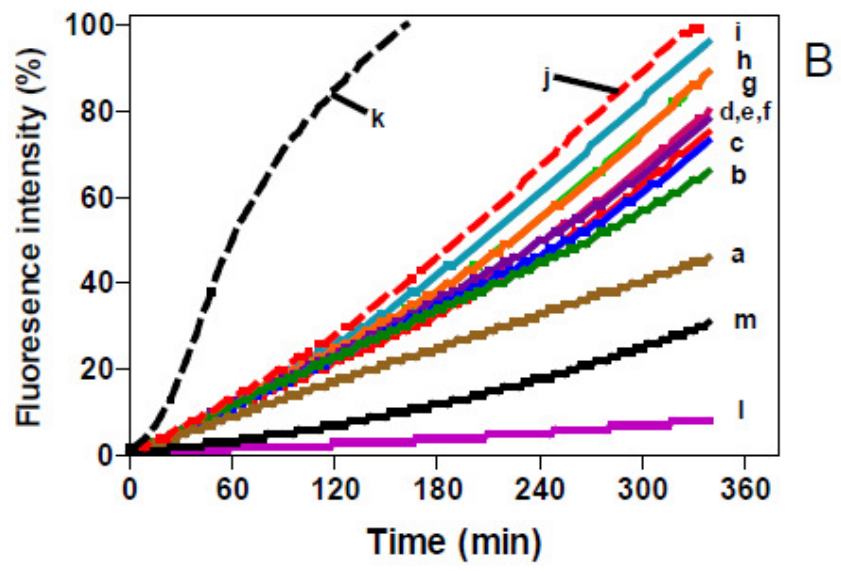

**Table S1.** Inhibition constants ( $K_i$ ) for choline-derived compounds against the *T. b. brucei* diamidine transporters

|                          | HAPT $K_i$ ( $\mu\text{M}$ ), $n$ | LAPT $K_i$ ( $\mu\text{M}$ ), $n$ |
|--------------------------|-----------------------------------|-----------------------------------|
| Pentamidine <sup>a</sup> | 0.036±0.006, 3                    | 56.2±8.3, 3                       |
| G25                      | 44±10, 4                          | 560±200, 3                        |
| M38                      | 45±4, 3                           | 200±70, 3                         |
| T4                       | 210±50, 3                         | >1000, 2                          |

All experiments were performed in triplicate with bloodstream form *T. b. brucei* 427.

The number of independent repeats is indicated.

<sup>a</sup>Values taken from: De Koning HP. Uptake of pentamidine in *Trypanosoma brucei brucei* is mediated by three distinct transporters. Implications for crossresistance with arsenicals. *Mol Pharmacol* 2001; **59**: 586-92.

**Table S2.** Flow cytometry results of DNA content of *T. brucei* bloodstream forms after treatment with choline test compounds

| Compounds         |        | 8 h    |        |         | 24 h   |        |         |
|-------------------|--------|--------|--------|---------|--------|--------|---------|
|                   |        | 2C (%) | 4C (%) | ≥8C (%) | 2C (%) | 4C (%) | ≥8C (%) |
| Drug-free control |        | 70.4   | 25.2   | 4.4     | 70.1   | 25.0   | 4.9     |
| T3                | 5 μM   | 61.0   | 31.7   | 7.3     | 70.9   | 23.7   | 5.4     |
|                   | 7.5 μM | 64.2   | 29.8   | 6.1     | 66.8   | 26.5   | 6.7     |
|                   | 10 μM  | 63.3   | 30.8   | 5.9     | 65.8   | 26.9   | 7.3     |
| T4                | 5 μM   | 63.2   | 29.9   | 6.9     | 73.9   | 21.7   | 4.5     |
|                   | 7.5 μM | 60.4   | 31.6   | 7.9     | 72.6   | 22.2   | 5.2     |
|                   | 10 μM  | 72.2   | 24.3   | 3.5     | 74.1   | 21.1   | 4.8     |
| M38               | 5 μM   | 76.0   | 20.2   | 3.8     | 83.5   | 14.4   | 2.1     |
|                   | 7.5 μM | 77.3   | 19.0   | 3.7     | 79.7   | 16.9   | 3.5     |
|                   | 10 μM  | 76.0   | 20.4   | 3.6     | ND     | ND     | ND      |
| G25               | 5 μM   | 76.4   | 20.0   | 3.6     | 82.5   | 15.4   | 2.1     |
|                   | 7.5 μM | 77.7   | 18.7   | 3.6     | 81.5   | 15.8   | 2.7     |
|                   | 10 μM  | 75.8   | 19.6   | 4.6     | ND     | ND     | ND      |
| MS1               | 5 μM   | 75.6   | 21.1   | 3.3     | ND     | ND     | ND      |
|                   | 7.5 μM | 75.3   | 21.3   | 3.5     | ND     | ND     | ND      |
|                   | 10 μM  | ND     | ND     | ND      | ND     | ND     | ND      |
| M53               | 5 μM   | 60.3   | 32.5   | 7.3     | 64.0   | 29.6   | 6.4     |
|                   | 7.5 μM | 65.6   | 28.3   | 6.1     | 57.4   | 36.2   | 6.4     |
|                   | 10 μM  | 76.0   | 20.6   | 3.4     | 60.1   | 33.5   | 6.4     |

ND, not determined because too few cells with intact DNA were observed.
